signs, symptoms and radiographic damage, resulting in improvement in functionality and quality of life. However longitudinal data for their retention and tolerability is sparse. Our objective was to evaluate real-world biologic therapy duration and reasons for discontinuing treatment.

**Methods:** We conducted a retrospective analysis of our PsA electronic register from 1994 up to and including April 2019 at our university teaching hospital. We had access to full patient records including details on co-morbidities, drugs and disease management.

**Results:** 335 patients were identified with PsA. 58% were female with mean age 46 yr (13-81). 113 (33.7%) patients had been treated with a biologic with 105 (93%) continuing at the time of analysis. 60 individuals were prescribed combination therapy with DMARDs. Mean age was 43.3 (13-81) with 56% women. The biologics sample was ethnically diverse including 80% White Caucasian patients, 17% Asian and others (3%). Significant co-morbidities included cardiovascular disease (18.6%) and diabetes (4.4%). Eight different biologics were in use with adalimumab being the most prescribed (67%). 35 (30.9%) patients had stopped biologics at some point with 76 episodes of cessation. 6% of our sample had discontinued two or more biologic treatments. The mean duration before biologic therapy was discontinued was 18.2 months (8 days to 9.5 years), which was almost twice as long as the average period before discontinuing a DMARD (9.9 months). Main reasons for stopping treatment included 23% each due to GI symptoms, neurological causes, cutaneous symptoms and other side effects. The remaining 8% reported fatigue as the reason for stopping therapy.

**Conclusion:** To our knowledge this is the first dedicated retrospective review of a large real world PsA cohort comparing drug survival and tolerability of biologics against DMARDs. Biologic therapies are well tolerated in psoriatic arthritis. There is no significant difference amongst various modes of action. Over a quarter of the patients discontinue the drug owing to intolerance with mean drug survival of 18 months. In contrast nearly two-thirds were intolerant of DMARDs and stopped within ten months. Thus both the rate and duration of biologic retention is significantly better than conventional DMARDs. This has significant economic impact as NICE guidelines require an adequate trial of two DMARDs for six months prior to advanced therapy. However, this approach is unlikely to be cost effective as the disease progresses whilst patients struggle with DMARDs prescription and thus delay biologics which are more likely to be tolerated and retained longer. Hence there is an urgent need to review NICE guidelines to allow earlier employment of biologics in the treatment paradigm with significant benefits to both patients and the health economy.

**Disclosures:** **I. Jawad:** None. **M.K. Nisar:** None.

#### EP43 BIOLOGIC RETENTION IN PSORIATIC ARTHRITIS: A REAL WORLD STUDY

Issrah Jawad and Muhammad K. Nisar  
Luton & Dunstable University Hospital, Rheumatology, Luton,  
UNITED KINGDOM

**Background:** Biologics have led to a sea change in the management of psoriatic arthritis (PsA) with unprecedented improvement in the
